# Supplementary material
Source: publisher site journal article supplement (http://www.scielo.br/pdf/rmat/v22s1/1517-7076-rmat-22-suppl-e11929.pdf)
Supplement: Supplementary file 1 [file 1517-7076-rmat-22-suppl-e11929.pdf]

## Análise comparativa entre diferentes ensaios porosimétricos em alumina macroporosa

João Vitor Campos<sup>1</sup>, Isabela Reis Lavagnini<sup>1</sup>, Julieta Adriana Ferreira<sup>1</sup>,  
Elton Tadeu Montrazi<sup>2</sup>, Tito José Bonagamba<sup>2</sup>,  
Elíria Maria de Jesus Agnolon Pallone<sup>1</sup>

<sup>1</sup> Faculdade de Zootecnia e Engenharia de Alimentos – FZEA – Universidade de São Paulo – USP – Av. Duque de Caxias Norte, 225, CEP 13635-900, Pirassununga – SP  
e-mail: joao2.campos@usp.br

<sup>2</sup> Instituto de Física de São Carlos, Universidade de São Paulo, CP 369, 13560-970, São Carlos, SP, Brasil

### RESUMO

Cerâmicas macroporosas de alumina ( $\text{Al}_2\text{O}_3$ ) são estudadas devido às suas diversas aplicações como biomateriais para implantes ósseos, ânodos para célula combustível de óxido sólido, entre outras. Nesse sentido, a distribuição, tamanho e interconexão dos poros podem determinar características físicas e mecânicas dessas cerâmicas. Assim sendo, o objetivo desse trabalho foi analisar e comparar diferentes métodos de caracterizações porosimétricas em amostras macroporosas de  $\text{Al}_2\text{O}_3$ . Para isso, os métodos analisados foram intrusão de mercúrio (PIM), método de Arquimedes (MA), análise de micrografias (AM) e ressonância magnética nuclear com pulsos de radiofrequência *Carr-Purcell-Meiboom-Gill* ( $^1\text{H}$ -RMN – CPMG). Amostras macroporosas de  $\text{Al}_2\text{O}_3$  foram obtidas pelo método de *gelcasting* modificado pela incorporação de esferas de polietileno, em diferentes quantidades. Os resultados foram tratados matematicamente e correlacionados pelo coeficiente de Pearson. As principais vantagens do MA foram a rapidez e a simplicidade na obtenção da porosidade aparente. No entanto, curvas de distribuição de tamanho de poros não são obtidas por esse método. As distribuições dos tamanhos dos poros obtidas por  $^1\text{H}$ -RMN – CPMG foram semelhantes às do PIM. Essa semelhança é evidenciada pelo alto coeficiente de Pearson entre os dois métodos ( $r > 0,962$ ). As análises da forma e homogeneidade dos poros, bem como a porosidade aparente, foram melhores determinadas por AM. Porém, quando comparada com o método PIM, divergências quanto à distribuição de tamanho de poros foram observadas. Isso é evidenciado pelo baixo coeficiente de Pearson ( $r < 0,048$ ). Pode-se assim concluir que métodos não convencionais na determinação da porosidade ( $^1\text{H}$ -RMN – CPMG e AM) podem ser utilizados alternativamente aos convencionais (PIM e MA) na caracterização de materiais macroporosos.

**Palavras-chave:** porosimetria, ressonância magnética, intrusão de mercúrio, análise de micrografias.

### ABSTRACT

Macroporous ceramics of  $\text{Al}_2\text{O}_3$  are being studied due their diverse applications (biomaterials, anode for solid oxide fuel cells, etc.). The pore distribution, size and interconnection are important parameters that can determine physical and mechanical characteristics of these materials. The aim of this study was analyze and compare different methods of porosimetry. For this, we used the mercury intrusion porosimetry (PIM), Archimedes method (MA), micrographic analysis (AM) and nuclear magnetic resonance with CPMG radiofrequency pulses ( $^1\text{H}$ -RMN – CPMG). Samples of macroporous  $\text{Al}_2\text{O}_3$  were obtained by the gelcasting method modified by incorporation of polyethylene spheres at different amounts. The results of these porosimetry methods were treated mathematically, and then the Pearson correlation between the pore size distributions were analyzed. The main advantage of the MA was the simplicity to obtain the apparent porosity, although this method did not provide the pore size distribution. The pore size distribution obtained by  $^1\text{H}$ -RMN – CPMG was similar to those obtained by PIM. The similarity of these results was evidenced by the high value of Pearson correlation ( $r > 0.962$ ) between these methods. The analysis of pore homogeneity and morphology were better obtained by AM method. Although, when AM were compared with PIM we observed differences in the pore size distribution. These were evidenced by the low value of Pearson correlation ( $r < 0.048$ ). Thus, unconventional porosimetry methods ( $^1\text{H}$ -RMN – CPMG and AM) could be used as an alternative to conventional (PIM and MA) to characterize macroporous materials.

**Keywords:** porosimetry, nuclear magnetic resonance, mercury intrusion, micrographic analysis.

## 1. INTRODUÇÃO

As cerâmicas porosas podem ser usadas em diversos campos de aplicações, tais como biomateriais para implantes ósseos [1-4], filtros de líquidos e gases [5,6], ânodo para células combustíveis de óxido sólido [7, 8], entre outros [9]. Devido às suas inúmeras aplicações, estudos têm sido desenvolvidos para incrementar as técnicas de processamento dessas cerâmicas porosas, tais como: inclusão de fase orgânica [10, 11]; método da réplica da esponja polimérica [12, 13]; método do *gelcasting* associado à aeração [14, 15]; entre outras [16, 17]. Dentre os métodos, o *gelcasting* promove a formação de um reticulado tridimensional, a partir da reação de copolimerização que, quando associado à aeração, possibilita a obtenção de uma estrutura com paredes densas, sem defeitos e ao mesmo tempo com elevada porosidade [14, 15, 18]. Para aumentar a porosidade e controlar o tamanho e morfologia de poros obtidos pelo processo *gelcasting*, pode-se adicionar uma segunda fase orgânica. Tanto o copolímero formado, quanto a segunda fase orgânica adicionada são completamente eliminados durante a calcinação, originando, por consequência, mais poros. Assim sendo, a facilidade em manipular quantidades e formatos das partículas da segunda fase orgânica, torna a combinação destas duas técnicas bastante atrativa [19].

Segundo a IUPAC (União Internacional de Química Pura e Aplicada) os materiais porosos podem ser classificados quanto às dimensões de seus poros: materiais microporosos - apresentam somente poros com diâmetro inferior a 0,002  $\mu\text{m}$ ; materiais mesoporosos - apresentam poros com diâmetros até 0,050  $\mu\text{m}$ ; e materiais macroporosos - apresentam poros com diâmetros superiores a 0,050  $\mu\text{m}$  [20]. Para avaliar tamanho e formato dos poros, bem como a interconectividade e distribuição destes, existem diversos métodos de caracterização porosimétrica. A porosimetria por intrusão de mercúrio (PIM) [21-23] e a porosidade aparente, baseada no princípio de Arquimedes (MA), são técnicas bastante usuais nas caracterizações destes materiais. O método PIM por apresentar uma elevada precisão na quantificação de poros abertos, é o mais utilizado na comparação e correlação com outros ensaios porosimétricos [21]. No entanto, é um método destrutivo e não permite a detecção de poros fechados. Além disso, há uma compressão da peça que pode alterar o tamanho dos poros [22]. Já o método MA tem como desvantagem a obtenção somente da porosidade aparente do material, não fornecendo informações quanto à distribuição do tamanho desses poros [21].

Dessa forma, alguns ensaios porosimétricos não destrutivos têm sido utilizados de forma alternativa, principalmente aqueles capazes de estimar a distribuição do tamanho dos poros. Dentre esses métodos, podem ser citados a análise de micrografias (AM) [24-26] e a ressonância magnética nuclear (RMN) [26].

A AM fornece a distribuição do tamanho de poros e informações qualitativas quanto à morfologia e homogeneidade dos poros da superfície de uma amostra porosa [24]. No entanto, há dificuldades em destacar automaticamente o objeto (poro) do fundo da imagem, sobretudo em amostras de elevada porosidade. Outra limitação desse método é a representação da estrutura somente em duas dimensões, não fornecendo informações quanto à profundidade dos poros presentes [21, 24].

A ressonância magnética nuclear com pulsos de radiofrequência *Carr-Purcell-Meiboom-Gill* ( $^1\text{H}$ -RMN – CPMG) pode ser utilizada como método na determinação de distribuição de tamanho de poros. Esse método baseia-se na saturação dos poros em água e na obtenção dos tempos de relaxações de  $^1\text{H}$  das moléculas da água. Além desse método não ser destrutivo, ele permite a comparação da distribuição de tamanho de poros entre amostras com diferentes porosidades [27-29].

Assim sendo, o objetivo do presente trabalho foi analisar e comparar diferentes métodos de caracterização porosimétrica (PIM, MA, AM e  $^1\text{H}$ -RMN – CPMG) aplicados em amostras macroporosas de  $\text{Al}_2\text{O}_3$  com diferentes porosidades.

## 1. MATERIAL E MÉTODOS

### 2.1 Preparo das amostras

As amostras porosas foram preparadas com  $\text{Al}_2\text{O}_3$  CT-3000SG (99,8 % de pureza e tamanho médio de partículas de 0,5  $\mu\text{m}$ ), fornecida por Alcoa & Chemicals Ltda. Foram preparadas suspensões aquosas com 40 % em massa de  $\text{Al}_2\text{O}_3$  e 30 % em massa de monômeros orgânicos N – hidroximetilacrilamida, N, N' - metilenobisacrilamida e metacrilamida (todos da Sigma-Aldrich) na proporção molar de 3:3:1. Em seguida, polimetacrilato de amônio foi adicionado à suspensão e desaglomerado em moinho de bolas por 30 minutos. A suspensão resultante foi então agitada continuamente em batedeira doméstica (Philips Walita, 200 W) enquanto foram adicionados espumante (Lutensol – FSA 10, Sigma-Aldrich), iniciador (persulfato de amônio,

Synth), catalisador (N, N, N', N' -tetrametiletilenodiamina, Sigma-Aldrich) e esferas de polietileno (PE, Li-cowax PE 520, Clariant) em diferentes proporções em massa de 0, 5 e 10 % seguindo a metodologia proposta por FONSECA *et al.* [19]. Após a secagem das amostras por 24 horas, foi realizada a calcinação usando taxa de aquecimento de 5 °C/min até 600 °C/1h e sinterização usando taxa de aquecimento de 10 °C/min à 1550 °C/2h, ambas em forno convencional [6]. Foram então obtidas amostras de Al<sub>2</sub>O<sub>3</sub> com diferentes porosidades, denominados de Al<sub>2</sub>O<sub>3</sub> – 0 % PE, Al<sub>2</sub>O<sub>3</sub> – 5 % PE e Al<sub>2</sub>O<sub>3</sub> – 10 % PE, de acordo com a inclusão das esferas de PE adicionadas durante sua preparação. Essas amostras foram então cortadas com serra-copo em formato cilíndrico com 1,0 cm diâmetro e 0,8 cm de altura.

## 2.2 Método de Arquimedes (MA)

A caracterização das amostras quanto à porosidade aparente (poros abertos) foi realizada baseada no princípio de Arquimedes, estabelecida em norma britânica [30]. O método consiste basicamente em obter a massa seca, úmida e imersa da amostra. A partir da Equação 1 é possível calcular a porosidade aparente da peça.

$$\%PA_{MA} = \frac{m_u - m_s}{m_u - m_i} \times 100 \quad (1)$$

Onde  $\%PA_{MA}$  é a porosidade aparente em %,  $m_u$  é a massa úmida;  $m_s$  é a massa seca; e  $m_i$  é a massa imersa.

Destaca-se que o MA pode ser comparado com os outros métodos apenas no que diz respeito à porosidade aparente, pois não fornece valores de distribuição de tamanho de poros.

## 2.3 Análise de Micrografias (AM)

Para obtenção das micrografias da superfície e da fratura das amostras foi utilizado um microscópio eletrônico de varredura (TM 3000, Hitachi). Cinco micrografias de diferentes regiões foram escolhidas aleatoriamente para cada amostra. Essas imagens foram trabalhadas e tratadas utilizando o programa *ImageJ* (domínio público, desenvolvido por *National Institute of Health*), a partir de ferramentas do programa (ajustes de contraste, *threshold*, binarização, erodir e dilatar) a fim de limiarizar os poros e janelas (interconexão entre poros).

A Figura 1 apresenta as etapas do processamento realizado nas micrografias para obtenção da segregação dos poros em relação ao fundo da amostra (matriz de Al<sub>2</sub>O<sub>3</sub>). Os poros das imagens limiarizadas foram aproximados a elipses, medidas e contadas a partir da ferramenta de análise de partículas do *ImageJ*. A metodologia aplicada para estimar a distribuição e tamanho de poros foi baseada na literatura [25, 26].

A partir das análises das micrografias, propôs-se uma maneira de se estimar a porosidade aparente. Para isso, foi calculada a proporção de poros superficiais nas micrografias de acordo com a Equação 2. Essa informação pode ser relacionada com a porosidade aparente obtida pelo MA.

$$\%PA_{AM} = \frac{A_p}{A_T} \times 100 \quad (2)$$

Onde  $\%PA_{AM}$  é a porcentagem de poros na imagem, diretamente relacionado com a porosidade aparente da amostra;  $A_p$  a área coberta de poros mais superficiais; e  $A_T$  a área total da imagem.

## 2.4 Ressonância Magnética (<sup>1</sup>H-RMN – CPMG)

O método de ressonância magnética nuclear, com pulsos de radiofrequência propostos por *Carr-Purcell-Meiboom-Gill* (<sup>1</sup>H-RMN – CPMG), pode ser utilizado como uma técnica complementar para análises poro-simétricas. Nesse método são obtidos os tempos de relaxação T<sub>2</sub> que são proporcionais com a relação superfície/volume dos poros [31].

Como os núcleos medidos foram de hidrogênio (<sup>1</sup>H), foi necessária a saturação das diferentes amostras de Al<sub>2</sub>O<sub>3</sub> com água destilada. Inicialmente a água foi desareada em vácuo, usando pressão de aproximadamente -86,66 kPa (pressão relativa), e em seguida as amostras foram mergulhadas em meio aquoso e o vácuo foi mantido por uma hora.

O ensaio de <sup>1</sup>H-RMN – CPMG foi realizado em um espectrômetro LapNMR (Tecmag) operando com um magneto de campo magnético de aproximadamente 0,47 T, resultando na frequência de ressonância de

aproximadamente 20 MHz para núcleos de  $^1\text{H}$ . As curvas de relaxação obtidas foram tratadas utilizando uma transformação inversa de exponenciais a fim de se obter as distribuições de tempos de relaxação  $T_2$  e suas correspondentes amplitudes [32].

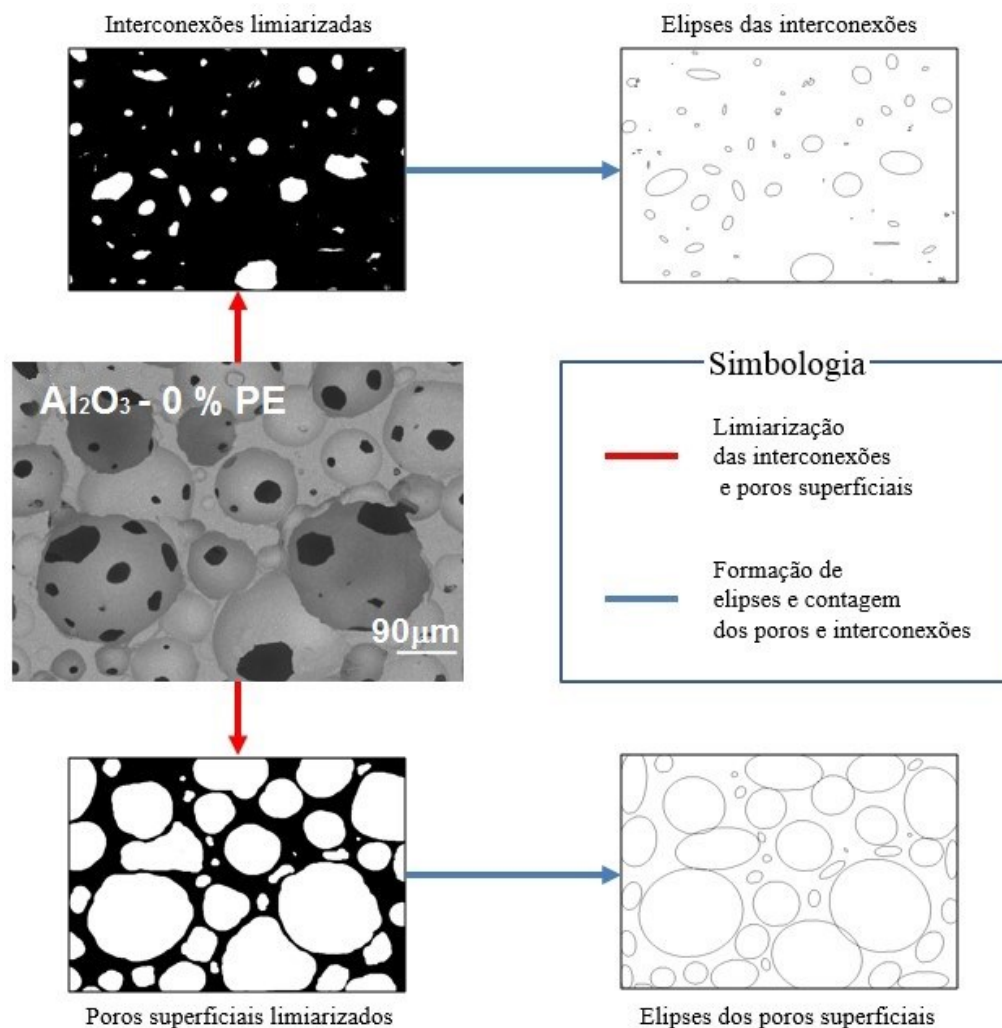

**Figura 1:** Etapas para obtenção da distribuição de tamanhos de poros usando o *ImageJ* a partir de micrografias.

## 2.5 Porosimetria por Intrusão de Mercúrio (PIM)

O método de intrusão de mercúrio é um dos métodos mais tradicionais na determinação da distribuição de tamanho de poros abertos e de porosidade aparente. Neste método, o mercúrio é injetado na amostra e a pressão é aumentada durante o processo medindo-se simultaneamente o volume de mercúrio introduzido. O diâmetro dos poros da peça é relacionado com a pressão necessária para injetar o mercúrio [26].

A pressão e o volume de mercúrio introduzido foram correlacionados a fim de se obter a porosidade porcentual e a distribuição do tamanho dos poros da amostra [33]. Para esse método, foi utilizado um porosímetro AutoPore IV 9500 (Micromeritics), evacuado a uma pressão de aproximadamente  $7 \cdot 10^{-6}$  MPa ( $\sim 50$  μmHg), seguido do preenchimento com mercúrio em uma pressão de 413,68 MPa. A distribuição do tamanho de poros foi determinada segundo o proposto na literatura [34,35].

## 2.6 Comparações dos resultados

Apesar dos métodos (com exceção do MA) exibirem dados proporcionais com relação à distribuição do tamanho de poros das amostras, as unidades dessas análises são diferentes. Além disso, como os dados dessas análises são apresentados em diferentes quantidades e intervalos de medidas, há certa dificuldade na comparação direta. Sendo assim, a fim de se comparar os resultados foram necessários alguns tratamentos matemáticos.

Primeiramente foi feita a normalização do eixo x e y das curvas experimentais, deixando-os em unidades aleatórias, utilizando na normalização a divisão pelo maior valor. Em seguida foi efetuada a segunda derivada dessas curvas. Para minimizar os ruídos, aplicou-se a função filtro Savitzky Golay polinomial de segundo grau nas curvas (a partir das ferramentas de *Peak Analyzer* do software *OriginPro 9 - OriginLab*). Com auxílio das curvas obtidas após aplicação da segunda derivada, foram identificadas as posições dos picos usados para encontrar curvas analíticas, que são convoluções de diversas curvas gaussianas centralizadas nestes picos. A fim de verificar se os dados experimentais são corretamente representados pelas curvas analíticas estimadas, foi utilizado o coeficiente de determinação ( $R^2$ ).

As posições e áreas dos picos das funções gaussianas que compõem as curvas analíticas de AM,  $^1\text{H}$ -RMN – CPMG e PIM foram usadas para comparar as distribuições de tamanho de poros, observadas entre os diferentes métodos. Esses resultados foram então correlacionados (linearmente) pelo coeficiente de Pearson ( $r$ ) [36]. A significância estatística considerada foi menor que 0,05 ( $p < 0,05$ ). A Figura 2 apresenta, na forma de fluxograma, os passos utilizados na metodologia usada na comparação dos resultados.

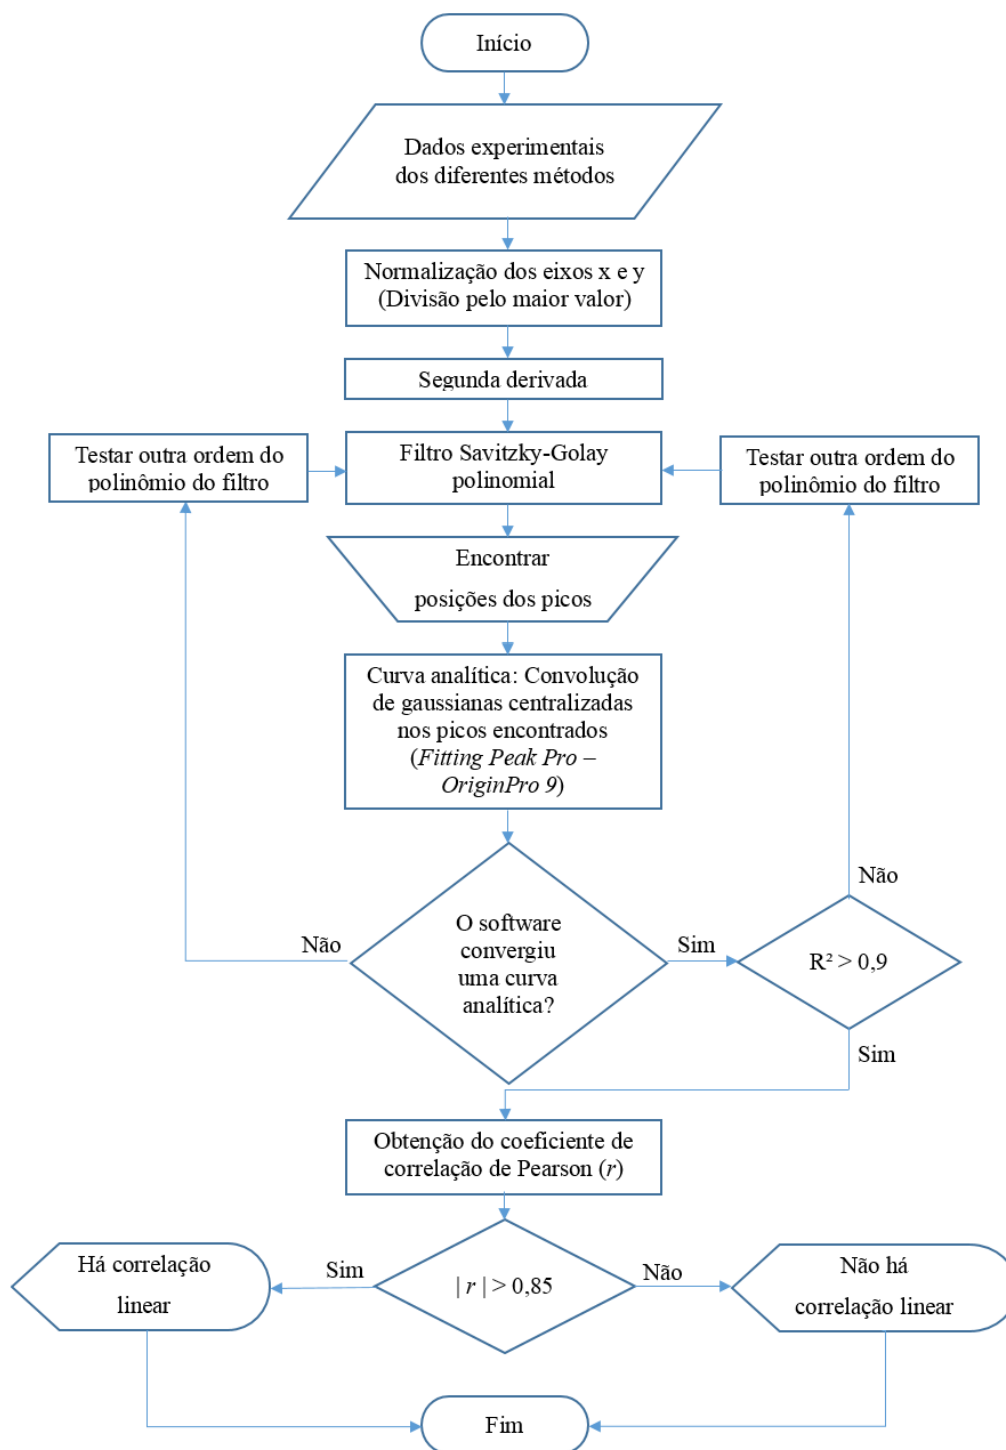

**Figura 2:** Algoritmo na forma de fluxograma dos tratamentos matemáticos para comparação entre os métodos.

## 2. RESULTADOS E DISCUSSÃO

A Tabela 1 apresenta os valores de porosidade aparente das amostras de  $\text{Al}_2\text{O}_3$  com diferentes adições de esferas de PE (0, 5 e 10 %), determinados por MA, AM e PIM. De modo geral, observa-se um aumento na porosidade aparente das amostras em função da adição de PE. Os valores determinados pelo AM foram mais próximos do que os determinados por PIM. Apesar dos valores encontrados pelo MA apresentarem a mesma tendência do que os demais métodos (em função do aumento de PE) observa-se que esses valores foram menores. Isto ocorre, pois, apesar da análise ser gravimétrica como o PIM, o MA não aplica pressão para que a água preencha os poros mais internos. Desta forma é esperado que a porosidade aparente obtida pelo MA seja inferior ao PIM.

**Tabela 1:** Valores de porosidade aparente medidos por diferentes métodos para amostras de  $\text{Al}_2\text{O}_3$  com diferentes adições de PE (0, 5 e 10 % m.).

| MÉTODO                                      | POROSIDADE APARENTE (%)                  |                                          |                                           |
|---------------------------------------------|------------------------------------------|------------------------------------------|-------------------------------------------|
|                                             | $\text{Al}_2\text{O}_3 - 0\% \text{ PE}$ | $\text{Al}_2\text{O}_3 - 5\% \text{ PE}$ | $\text{Al}_2\text{O}_3 - 10\% \text{ PE}$ |
| Método de Arquimedes – MA                   | $30,03 \pm 0,02$                         | $51,30 \pm 0,07$                         | $52,90 \pm 0,03$                          |
| Análise de micrografias – AM                | $56,38 \pm 0,34$                         | $65,55 \pm 4,09$                         | $67,66 \pm 7,64$                          |
| Porosimetria por intrusão de mercúrio – PIM | $62,25 \pm 0,00$                         | $72,05 \pm 0,00$                         | $74,98 \pm 0,00$                          |

Já os valores de porosidade aparente observados no AM foram mais próximos dos resultados do PIM. A variação entre estes resultados se deve ao fato de que o AM considera apenas os poros da superfície das amostras. Já os resultados da análise do PIM são referentes à porosidade de toda amostra. Nesse sentido, uma pequena variação entre esses métodos é esperada devido à heterogeneidade da porosidade ao longo da amostra [21].

A Figura 3 apresenta as micrografias da superfície de fratura das amostras de  $\text{Al}_2\text{O}_3$  com diferentes adições de esferas de PE (0, 5 e 10 %). Nessas micrografias os poros e suas interconexões (representados por áreas mais escuras dentro de poros) podem ser observados. Poros esféricos com diferentes diâmetros e com elevado grau de interconectividade (representado pelo elevado número de janelas entre os poros) também são observados. Além disso, verifica-se que o grau de interconectividade aumenta em função da segunda fase orgânica adicionada.

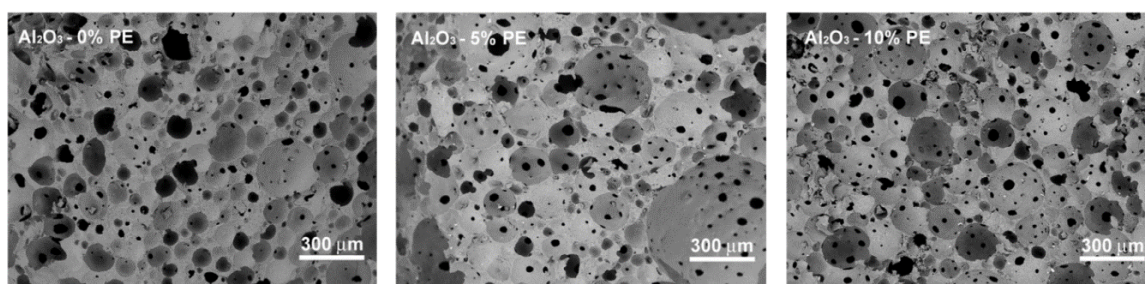

**Figura 3:** Micrografias das amostras de  $\text{Al}_2\text{O}_3$  com as diferentes adições de PE:  $\text{Al}_2\text{O}_3 - 0\% \text{ PE}$ ,  $\text{Al}_2\text{O}_3 - 5\% \text{ PE}$  e  $\text{Al}_2\text{O}_3 - 10\% \text{ PE}$ .

A Figura 4 apresenta curvas analíticas simuladas matematicamente a partir da distribuição do tamanho dos poros obtidos pelo AM das superfícies de todas as amostras. A partir dessas curvas, podem ser observadas três regiões principais: uma entre 0,01 e 1  $\mu\text{m}$ ; outra entre 2 e 10  $\mu\text{m}$ ; e uma terceira entre 50 e 300  $\mu\text{m}$ . A primeira região, é atribuída às interconexões entre poros e também por poros pequenos formados pela aeração do método *gelcasting*. A segunda região está associada aos poros intermediários gerados principalmente pela adição de PE. A terceira região representa os poros maiores associados à aeração combinada com a adição de PE. É importante observar que quando a segunda fase orgânica foi adicionada nas amostras  $\text{Al}_2\text{O}_3 - 5\% \text{ PE}$  e  $\text{Al}_2\text{O}_3 - 10\% \text{ PE}$ , ocorreu uma diminuição substancial da primeira região (0,01 e 1  $\mu\text{m}$ ) e um simultâneo aumento da segunda região (2 e 10  $\mu\text{m}$ ).

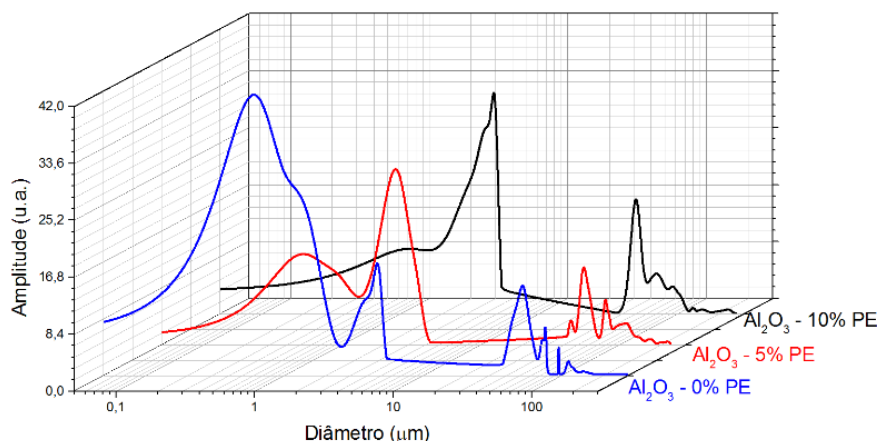

**Figura 4:** Curvas analíticas obtidas por soma das deconvoluções ( $R^2 > 0,99$ ) da distribuição dos tamanhos de poros caracterizadas por AM nas amostras de  $\text{Al}_2\text{O}_3$  preparadas com diferentes quantidades de PE.

Os fatores que podem influenciar na subestimação do tamanho dos poros, assim como sua distribuição, nos resultados do AM podem ser explicados em função de algumas considerações:

- (i) Atribuição do diâmetro superficial observado nas micrografias como sendo o diâmetro real da esfera do poro;
- (ii) Interpretação equivocada das interconexões como sendo diâmetros de poros esféricos;
- (iii) Exposição parcial das interconexões entre os poros nas micrografias.

Todas essas considerações podem induzir a uma análise e medição do tamanho dos poros inferiores ao tamanho real, levando à obtenção de uma curva de distribuição de tamanho de poros que não representa a amostra como um todo. A Figura 5 ilustra as considerações propostas que podem acarretar em uma análise equivocada das micrografias.

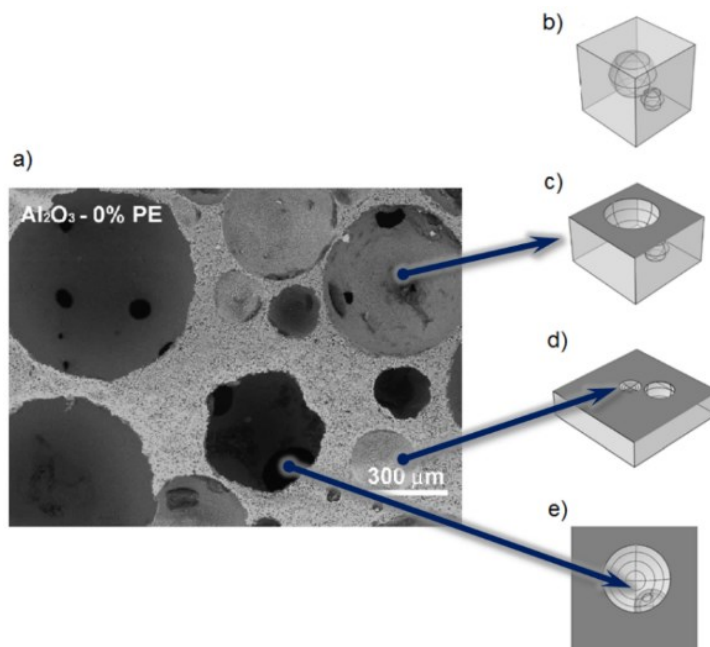

**Figura 5:** Representação 3D de dois poros em contato em diferentes cortes: a) micrografia de superfície; b) peça inteira; c) corte onde o poro maior é exposto; d) corte onde ambos os poros estão expostos; e) corte onde fica evidente a intersecção dos poros.

Para obtenção quantitativa da porosidade e do tamanho de poros pelo método  $^1\text{H}$ -RMN – CPMG seria necessário determinar as constantes de proporcionalidade de amplitude de sinal e da relaxatividade superfí-

al do meio poroso. No entanto, uma análise qualitativa das distribuições dos tempos de relaxação  $T_2$  é suficiente para prever a distribuição de poros em uma amostra. Nesse sentido, as análises do  $^1\text{H}$  RMN – CPMG apresentaram tanto a presença de três diferentes tipos de poros, quanto a proporcionalidade da porosidade entre eles [18]. A Figura 6 apresenta as curvas analíticas obtidas por  $^1\text{H}$ -RMN – CPMG para as amostras de  $\text{Al}_2\text{O}_3$  com diferentes adições de esferas de PE (0, 5 e 10 %).

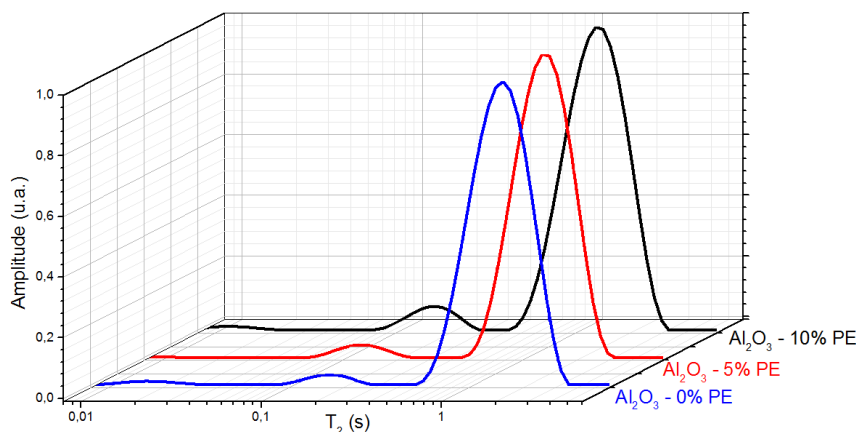

**Figura 6:** Distribuições de tempo de relaxação  $T_2$  obtidas por  $^1\text{H}$ -RMN – CPMG para as diferentes amostras de  $\text{Al}_2\text{O}_3$  preparadas com adições de 0, 5 e 10 % de PE.

Verifica-se na Figura 6 a presença de três picos principais em todas as composições. O primeiro pico próximo a 0,01 s pode ser atribuído à presença de poros menores na amostra de  $\text{Al}_2\text{O}_3$  que não foram fechados completamente durante a sinterização, imperceptíveis nas aproximações das micrografias usadas no AM. Já o segundo (em torno de 0,18 s) e o terceiro (em torno de 1,5 s) estão associados aos poros maiores originados pela aeração e adição de esferas de PE durante o processamento de *gelcasting*.

As Figura 7 (a) e (b) apresentam, respectivamente, as curvas analíticas resultantes do tratamento matemático realizado nas distribuições desses poros e a distribuição do tamanho de poros, representada como volume de intrusão diferencial em função do diâmetro dos poros, obtidos por PIM.

Apesar de o PIM ser amplamente utilizado, a distribuição de tamanho de poros é feita considerando-se o formato dos poros cilíndricos, segundo a equação de Washburn [35]. Quando há interconexão entre dois poros, é necessária a aplicação de pressão para o mercúrio superar o efeito de capilaridade e ocupar o segundo poro. Esse segundo poro é maior do que a interconectividade e consequentemente o mercúrio irá ocupar um volume maior. Como nesse ensaio assume-se que os poros têm formatos cilíndricos, as interconexões entre os poros são erroneamente considerados como sendo diversos poros do tamanho dessas interconectividades, levando assim a valores de distribuições de poros que não correspondem exatamente à morfologia da amostra analisada [35].

A Figura 8 ilustra o efeito da maior aplicação de pressão para que o mercúrio possa atravessar as interconexões. Nessa figura foram representadas duas etapas distintas do PIM. Em um primeiro momento, uma pressão P1 é aplicada na amostra e o mercúrio é injetado apenas nos poros mais superficiais, representados pela letra A. Em um segundo momento, é aplicada uma pressão P2 maior que P1, de forma que o mercúrio seja injetado em poros mais profundos (B), através de interconexões pequenas. Pode-se observar que neste exemplo todo o volume de mercúrio introduzido nos poros B seria computado de forma equivocada, como uma grande quantidade de poros do tamanho das interconexões existentes entre os poros.

Dessa forma, observa-se pela distribuição de poros determinado por PIM (Figura 7) que quanto maior a adição de PE, maior a área sob a curva analítica, podendo ser relacionada com a porosidade aparente (Tabela 1). Observa-se também que há uma grande quantidade de poros com diâmetros próximos a 30  $\mu\text{m}$  que não foram observados nas micrografias (Figura 3).

Comparações qualitativas e visuais das curvas analíticas obtidas nos diferentes métodos (AM, PIM e  $^1\text{H}$ -RMN – CPMG) mostraram, de forma geral, que as curvas do AM diferenciaram-se significativamente na distribuição de tamanho de poros, principalmente nas regiões entre 0,01 - 1  $\mu\text{m}$  e entre 2 - 10  $\mu\text{m}$  (Figuras 5 e 6).

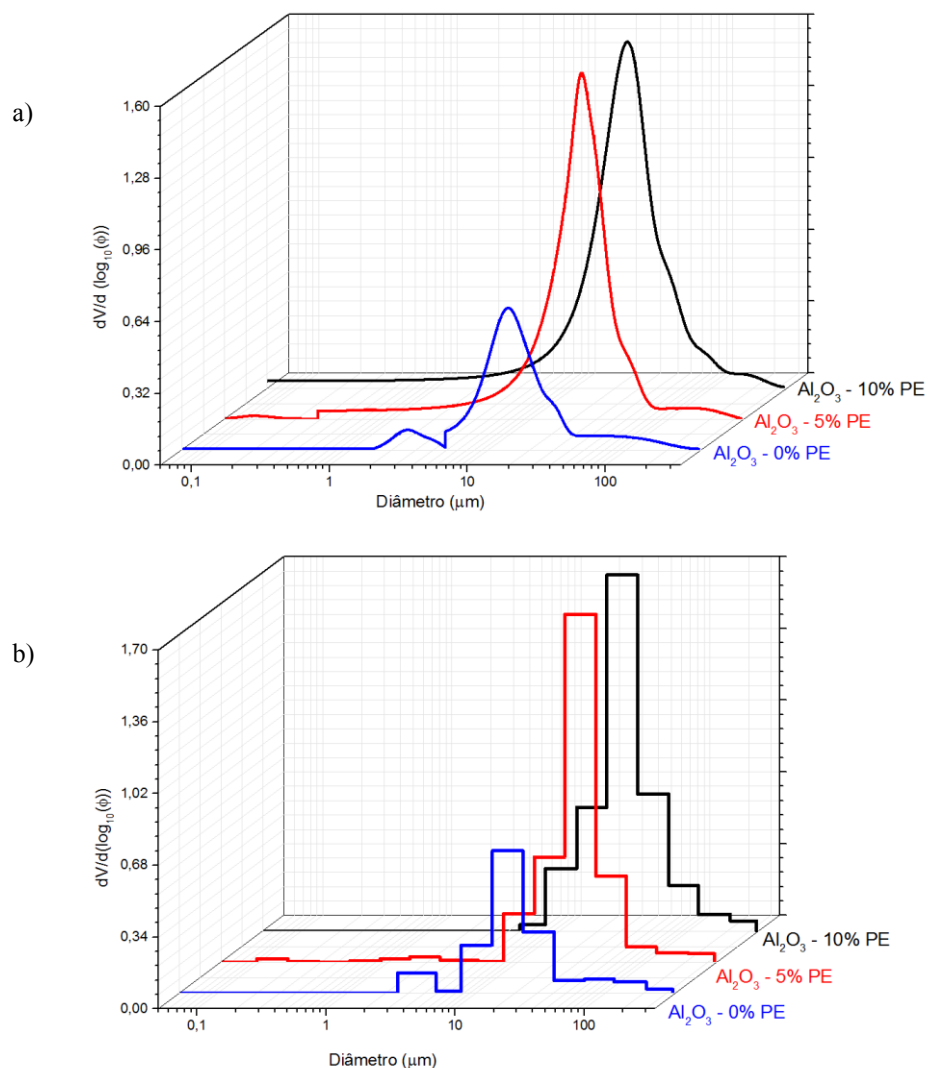

**Figura 7:** Distribuição de tamanho de poros obtida a partir do PIM para as amostras de  $\text{Al}_2\text{O}_3$  com diferentes adições de esferas (0, 5 e 10 % PE): a) curvas analíticas após tratamento matemático da distribuição dos poros; b) dados fornecidos pelo porosímetro.

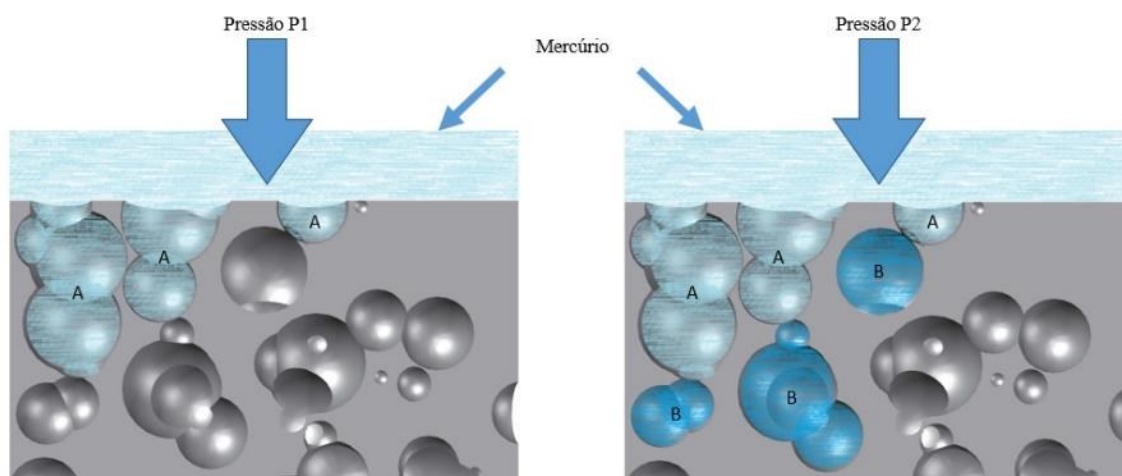

**Figura 8:** Representação do PIM no corte de uma amostra macroporosa, sob diferentes pressões, em que  $P1 < P2$ . Os poros A são considerados erroneamente como maiores que os poros B, devido ao fato da técnica considerá-los como sendo de formato cilíndrico.

A Tabela 2 apresenta os valores de correlações segundo o coeficiente de Pearson entre as áreas e diâmetros dos poros obtidos pelos métodos AM e  $^1\text{H-RMN} - \text{CPMG}$  e a comparação com o PIM. Quanto aos diâmetros dos poros, houve uma correlação linear entre os resultados obtidos tanto por PIM e AM ( $0,872 < r < 0,972$ ), quanto por PIM e  $^1\text{H-RMN} - \text{CPMG}$  (onde os diâmetros foram representados por  $T_2$ ) ( $0,962 < r < 0,999$ ). Essas correlações podem ser explicadas pelo perfil das curvas analíticas que indicaram a presença de três conjuntos de distribuição de poros com tamanhos diferentes na amostra de  $\text{Al}_2\text{O}_3$ . Apesar de ambas as correlações das áreas dos picos de PIM/AM e PIM/ $^1\text{H RMN} - \text{CPMG}$  apresentarem baixa correlação linear, de uma forma geral, pode-se observar que os resultados de PIM ( $0,048 < r < 0,605$ ) diferiram-se mais da AM do que  $^1\text{H RMN} - \text{CPMG}$  ( $0,552 < r < 0,686$ ). Isso ocorreu devido às diferenças nas curvas observadas pelos erros associados ao método AM (discutidos anteriormente).

**Tabela 2:** Valores de correlações de Pearson dos picos das curvas analíticas dos métodos AM,  $^1\text{H RMN} - \text{CPMG}$  e PIM para as amostras de  $\text{Al}_2\text{O}_3$  com diferentes adições de esferas PE (0, 5 e 10 %).

| CORRELAÇÃO DE PEARSON ( $r$ )                        | $\text{Al}_2\text{O}_3 - 0\% \text{ PE}$ | $\text{Al}_2\text{O}_3 - 5\% \text{ PE}$ | $\text{Al}_2\text{O}_3 - 10\% \text{ PE}$ |
|------------------------------------------------------|------------------------------------------|------------------------------------------|-------------------------------------------|
| $T_{AM\text{área}}/T_{PIM\text{área}}$               | 0,048                                    | 0,514                                    | 0,605                                     |
| $T_{AM\text{diâmetro}}/T_{PIM\text{diâmetro}}$       | 0,872                                    | 0,898                                    | 0,972                                     |
| $T^{1\text{H RMN-CPMG área}}/T_{PIM\text{área}}$     | 0,686                                    | 0,552                                    | 0,573                                     |
| $T^{1\text{H RMN-CPMG } T_2}/T_{PIM\text{diâmetro}}$ | 0,999                                    | 0,962                                    | 0,977                                     |

### 3. CONCLUSÕES

De forma geral, observou-se que a determinação da porosidade aparente pelo MA não corresponde ao valor real em uma matriz macroporosa. Já o método AM pode ser usado como um ensaio alternativo na caracterização da porosidade aparente, pois apresentou resultados mais próximos aos do PIM. No entanto, esse método porosimétrico, quando aplicado em amostras macroporosas e de elevada interconexão de poros, pode subestimar o tamanho dos poros acarretando em uma significativa diferença na sua distribuição, quando comparado aos demais métodos (PIM e  $^1\text{H-RMN} - \text{CPMG}$ ). Todavia, é comum obter micrografias das amostras para observar outros parâmetros dos poros como, por exemplo, forma, homogeneidade e grau de interconexão.

A elevada correlação observada entre as distribuições de poros determinados por PIM e  $^1\text{H-RMN} - \text{CPMG}$  permite usar o método não convencional como um ensaio porosimétrico confiável na determinação e identificação de poros. Como, por exemplo, na análise de qualidade em materiais fabricados em larga escala pela indústria. A principal vantagem do método  $^1\text{H-RMN} - \text{CPMG}$ , quando comparado ao PIM e ao AM, é a rapidez nas identificações e caracterizações dos poros, além de ser um ensaio não destrutivo.

### 4. AGRADECIMENTOS

Os autores são gratos pelo suporte financeiro à Coordenação de Aperfeiçoamento de Pessoal de Nível Superior (CAPES) e ao Conselho Nacional de Desenvolvimento Científico e Tecnológico (CNPq) e também a empresa Clariant pela doação das esferas de polietileno Licowax PE 520.

### 5. BIBLIOGRAFIA

- [1] FOOK, A. C. B. M., APARECIDA A. H., FOOK, M. L. V. “Desenvolvimento de biocerâmicas porosas de hidroxiapatita para utilização como scaffolds para regeneração óssea”, *Revista Matéria*, v. 15, n. 3, pp. 392–399, 2010.
- [2] NARKEVICA, I., STIPNIECE, L., JAKOBSONS, E., *et al.*, “Electrically active and 3D porous  $\text{TiO}_2$ -x ceramic scaffolds for bone tissue regeneration”, *Journal of European Ceramic Society*, v. 37, n. 2, pp. 833–840, 2017.
- [3] HAUGEN, H. J., MONJO, M., RUBERT, M., *et al.*, “Porous ceramic titanium dioxide scaffolds promote bone formation in rabbit peri-implant cortical defect model”, *Acta Biomaterialia*, v. 9, n. 2, pp. 5390–5399, 2013.
- [4] SPIES, B. C., SAUTER, C., WOLKEWITZ, M., *et al.*, “Alumina reinforced zirconia implants: Effects of cyclic loading and abutment modification on fracture resistance”, *Dental Materials*, v. 31, n. 3, pp. 262–272, Mar. 2015.

- [5] ORTEGA, F. S., ROCHA K. M., ZAIAT, M., *et al.*, “Aplicação de espumas cerâmicas produzidas via ‘gelcasting’ em biorreator para tratamento anaeróbio de águas residuárias”, *Cerâmica*, v. 47, n. 304, pp. 199–203, 2001.
- [6] SOUZA, E., ORTEGA, F. S., PANDOLFELLI, V. C. “Produção e caracterização de espumas de alumina pelo processo gelcasting sem controle atmosférico”, *Cerâmica*, v. 55, pp. 151–156, 2009.
- [7] GÓMEZ-MARTÍN, A., ORIHUELA, M. P., BECERRA, J. A., *et al.*, “Permeability and mechanical integrity of porous biomorphic SiC ceramics for application as hot-gas filters”, *Materials & Design*, v. 107, pp. 450–460, 2016.
- [8] HAN, Z., WANG, Y., YANG, Z., *et al.*, “Electrochemical Properties of Tubular SOFC Based on a Porous Ceramic Support Fabricated by Phase-Inversion Method”, *Journal of Materials Science & Technology*, v. 32, n. 7, pp. 681–686, 2016.
- [9] JOO, J., CHOI, G. “Open-circuit voltage of ceria-based thin film SOFC supported on nano-porous alumina”, *Solid State Ionics*, v. 178, n. 29–30, pp. 1602–1607, 2007.
- [10] PRABHAKARAN, K., MELKERI, A., GOKHALE, N. M., *et al.*, “Preparation of macroporous alumina ceramics using wheat particles as gelling and pore forming agent”, *Ceramics International*, v. 33, n. 1, pp. 77–81, 2007.
- [11] ŽIVCOVÁ, Z., GREGOROVÁ, E., PABST, W., *et al.*, “Thermal conductivity of porous alumina ceramics prepared using starch as a pore-forming agent”, *Journal of European Ceramic Society*, v. 29, n. 3, pp. 347–353, 2009.
- [12] JAMALUDIN, A. R., KASIM, S. R., ISMAIL, A. K., *et al.*, “The effect of sago as binder in the fabrication of alumina foam through the polymeric sponge replication technique”, *Journal of European Ceramic Society*, v. 35, n. 6, pp. 1905–1914, 2015.
- [13] WANG, C., CHEN, H., ZHU, X., *et al.*, “An improved polymeric sponge replication method for biomedical porous titanium scaffolds”, *Material Science and Engineering: C*, v. 70, pp. 1192–1199, 2017.
- [14] DENG, X., WANG, J., LIU, J., *et al.*, “Low cost foam-gelcasting preparation and characterization of porous magnesium aluminate spinel (MgAl<sub>2</sub>O<sub>4</sub>) ceramics”, *Ceramics International*, v. 42, n. 16, pp. 18215–18222, 2016.
- [15] DENG, X., WANG, J., LIU, J., *et al.*, “Preparation and characterization of porous mullite ceramics via foam-gelcasting”, *Ceramics International*, v. 41, n. 7, pp. 9009–9017, 2015.
- [16] AL-ATTAR, A. A., ASLE ZAEEM, M., AJEEL, S. A., *et al.*, “Effects of SiC, SiO<sub>2</sub> and CNTs nanoadditives on the properties of porous alumina-zirconia ceramics produced by a hybrid freeze casting-space holder method”, *Journal of European Ceramic Society*, v. 37, n. 4, pp. 1635–1642, 2017.
- [17] WANG, X., LI, J., LI, Y., *et al.*, “Emulsion-templated fully three-dimensional interconnected porous titania ceramics with excellent humidity sensing properties”, *Sensors Actuators B: Chemical*, v. 237, pp. 894–898, 2016.
- [18] POZZOBOM, I. E. F., DONATEL, K., SOUSA, E., “Processamento e caracterização de espumas (LZSA) produzidas por gelcasting”, *Revista Matéria*, v. 19, n. 2, pp. 117–124, 2014.
- [19] FONSECA, F. M., HENRIQUE, M., HENRIQUE, L., LOURO, L., “Fabricação de biocerâmicas porosas de hidroxiapatita por gelcasting”, *Revista Militar de Ciência e Tecnologia*, v. 28, n. 1, pp. 33–41, 2011.
- [20] ROUQUEROL, J., AVNIR, D., FAIRBRIDGE, C.W., *et al.* “Recommendations for the characterization of porous solids”, *Pure and Applied Chemistry*, v. 66, n. 8, pp. 1739–1758, 1994.
- [21] ZOU, Y., MALZBENDER, J. “Development and optimization of porosity measurement techniques” *Ceramics International*, v. 42, n. 2, pp. 2861–2870, 2016.
- [22] FIOCCO, L., LI, S., STEVENS, M. M., *et al.*, “Biocompatibility and bioactivity of porous polymer-derived Ca-Mg silicate ceramics”, *Acta Biomaterialia*, v. 50, pp. 56–67, 2017.
- [23] SUJKA, M., SOKOLOWSKA, Z., HAJNOS, M., *et al.*, “Characterization of pore structure of rice grits extrudates using mercury intrusion porosimetry, nitrogen adsorption and water vapour desorption methods” *Journal of Food Engineering*, v. 190, pp. 147–153, 2016.
- [24] ZATTERA, A. J., BIANCHI, O., ZENI, *et al.*, “Caracterização de Resíduos de Copolímeros de Etileno-Acetato de Vinila - EVA”, *Polímeros Ciência e Tecnologia*, v. 15, n. 1, pp. 73–78, 2005.

- [25] HANNICKEL, A., HENRIQUE, M., LINS, H., *et al.*, “Image J como ferramenta para medida da área de partículas de magnetita em três escalas nanométricas”, *Revista Militar de Ciência e Tecnologia*, v. 29, n. 4, pp. 16–26, 2012.
- [26] PADHY, G. S., LEMAIRE, C., AMIRTHARAJ, E. S., *et al.*, “Pore size distribution in multiscale porous media as revealed by DDIF–NMR, mercury porosimetry and statistical image analysis”, *Colloids Surfaces A: Physicochemistry Engineering Aspects*, v. 300, n. 1–2, pp. 222–234, 2007.
- [27] SONG, Y., “Novel NMR techniques for porous media research”, *Cement and Concrete Research*, v. 37, n. 3, pp. 325–328, Mar. 2007.
- [28] ZHANG, Y., BLÜMICH, B., “Spatially resolved D–T2 correlation NMR of porous media”, *Journal of Magnetic Resonance*, v. 242, pp. 41–48, 2014.
- [29] MORAES, T. B., COLNAGO, L. A. “Simulation of NMR signals through the Bloch equations”, *Química Nova*, v. 37, n. 8, pp. 1410–1416, 2014.
- [30] BRITISH STANDARD INSTITUTION, *Advanced technical ceramics - Monolithic ceramics - General and textural properties. Part 2: Determination of density and porosity*, Londres, 1993.
- [31] GOMBIA, M., FANTAZZINI, P., RAMBALDI, E., *et al.*, “Water 1H NMR Technique to Analyse the Porous Structure of Ceramics”, *Advanced Engineering Materials*, v. 10, n. 3, pp. 235–240, 2008.
- [32] MONTRAZI, E. T. “Estudo de cerâmicas porosas de alumina através da medida de tempos de relaxação via ressonância magnética nuclear”, Dissertação M.Sc., Instituto de Física de São Carlos, Universidade de São Paulo, 2012.
- [33] WEBER, E., FERNANDEZ, M., WAPNER, P., *et al.*, “Comparison of X-ray micro-tomography measurements of densities and porosity principally to values measured by mercury porosimetry for carbon–carbon composites”, *Carbon*, v. 48, n. 8, pp. 2151–2158, 2010.
- [34] SØRLAND, G. H., DJURHUUS, K., WIDERØE, H. C., *et al.*, “Absolute pore size distributions from NMR”, *Diffusion-Fundamentals*, v. 5, n. 4, pp. 1–15, 2007.
- [35] PASTORINO, D., CANAL, C., GINEBRA, M. “Multiple characterization study on porosity and pore structure of calcium phosphate cements”, *Acta Biomaterialia*, v. 28, pp. 205–214, 2015.
- [36] LIN, C. J., HUNG, S. C., CHANG, F.C., *et al.*, “Finding the optimal deconvolution algorithm for MR perfusion in carotid stenosis: Correlations with angiographic cerebral circulation time”, *Journal of Neuro-radiology*, v. 43, n. 4, pp. 290–296, 2016.
